# Supplementary material for: Preparation and characterization of multi stimuli-responsive photoluminescent nanocomposites of graphene quantum dots with hyperbranched polyethylenimine derivatives
Source: Royal Society of Chemistry journal article supplement (doi:10.1039/c4nr00739e), 2014-01-01
Supplement: c4nr00739e1.pdf [file c4nr00739e1.pdf]

## Supporting Information

# **Preparation and characterization of multistimuli-responsive photoluminescent nanocomposites of graphene quantum dots with hyperbranched polyethylenimine derivatives**

Xing Liu, Hua-Ji Liu, Fa Cheng and Yu Chen\*

Department of Chemistry, School of Sciences, Tianjin University, and Collaborative Innovation Center of Chemical Science and Engineering (Tianjin), 300072 Tianjin, P. R. China

Corresponding author, Tel.: +86-22-27403475; fax: +86-22-27403475

E-mail: [chenyu@tju.edu.cn](mailto:chenyu@tju.edu.cn) (Yu Chen).

Table S1. Results of elemental analysis on GQD-PEI

| Feed ratio of<br>PEI/OGS | Elemental analysis of GQD-PEI (%) |       |       |       | H content of<br>graphene <sup>a</sup> (%) | C content of<br>graphene <sup>b</sup> (%) |
|--------------------------|-----------------------------------|-------|-------|-------|-------------------------------------------|-------------------------------------------|
|                          | C                                 | H     | N     | O     |                                           |                                           |
| 0.3                      | 23.94                             | 7.00  | 12.75 | 56.31 | 2.45                                      | 2.08                                      |
| 1.0                      | 30.36                             | 9.55  | 14.62 | 45.47 | 4.33                                      | 5.29                                      |
| 5.0                      | 48.75                             | 11.55 | 26.02 | 13.68 | 2.26                                      | 4.14                                      |

<sup>a</sup> Weight percentage of the protons of GQD moiety in GQD-PEI. <sup>b</sup> Weight percentage of the carbons of GQD moiety in GQD-PEI.

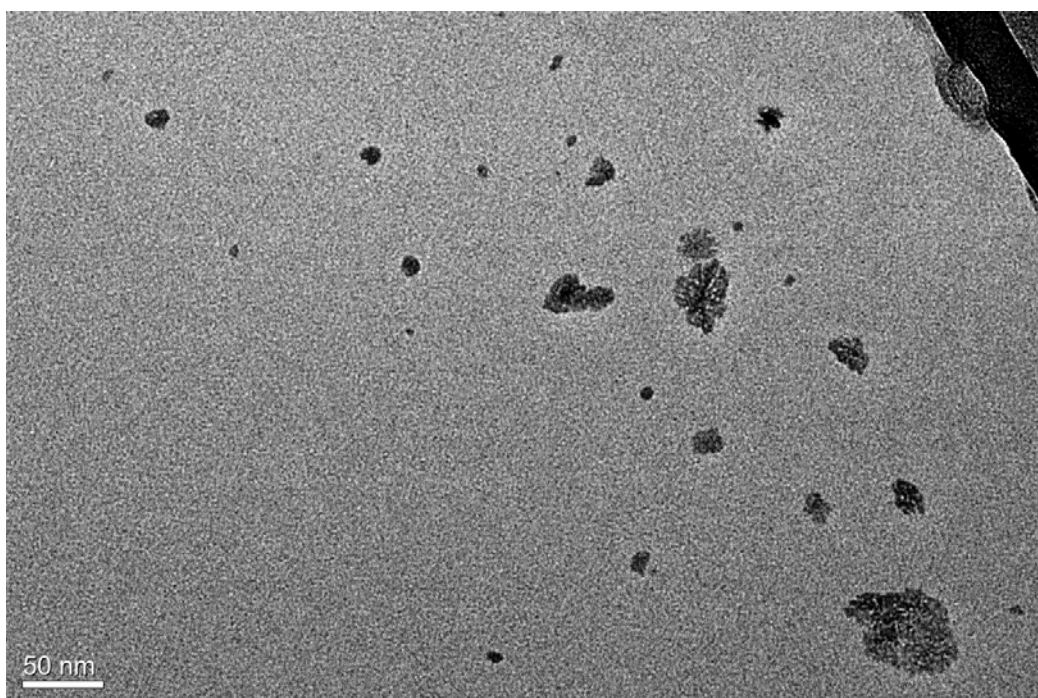

**Figure S1.** Typical TEM image of GQD-PEI prepared at high PEI/OGS ratio (GQD3)

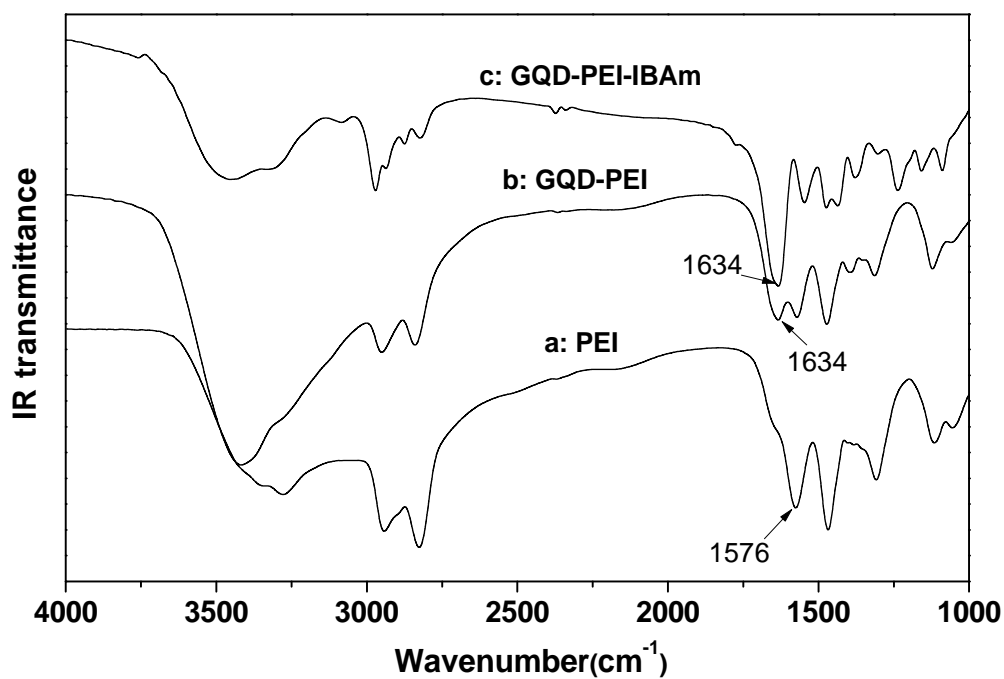

**Figure S2.** The typical FTIR spectra of (A) PEI, (B) GQD-PEI (GQD3) and (C) GQD-PEI-IBAm (T-GQD3)

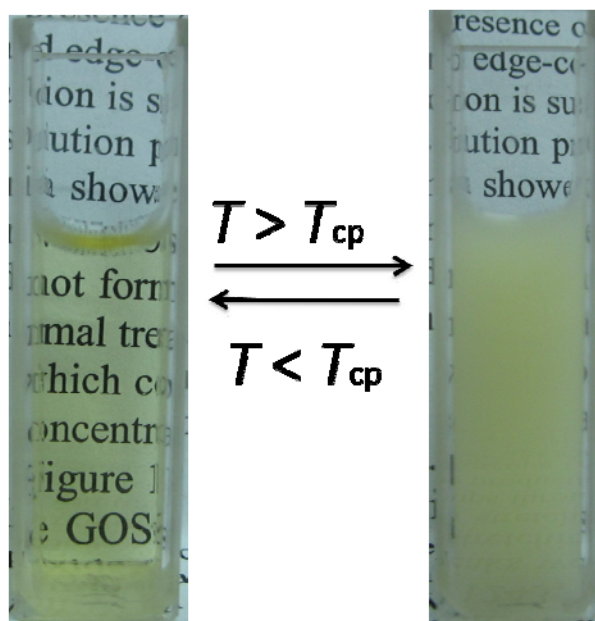

**Figure S3.** The typical photographs of the aqueous solution of GQD-PEI-IBAm below and above the phase transition temperature (T-GQD3 as the representative)

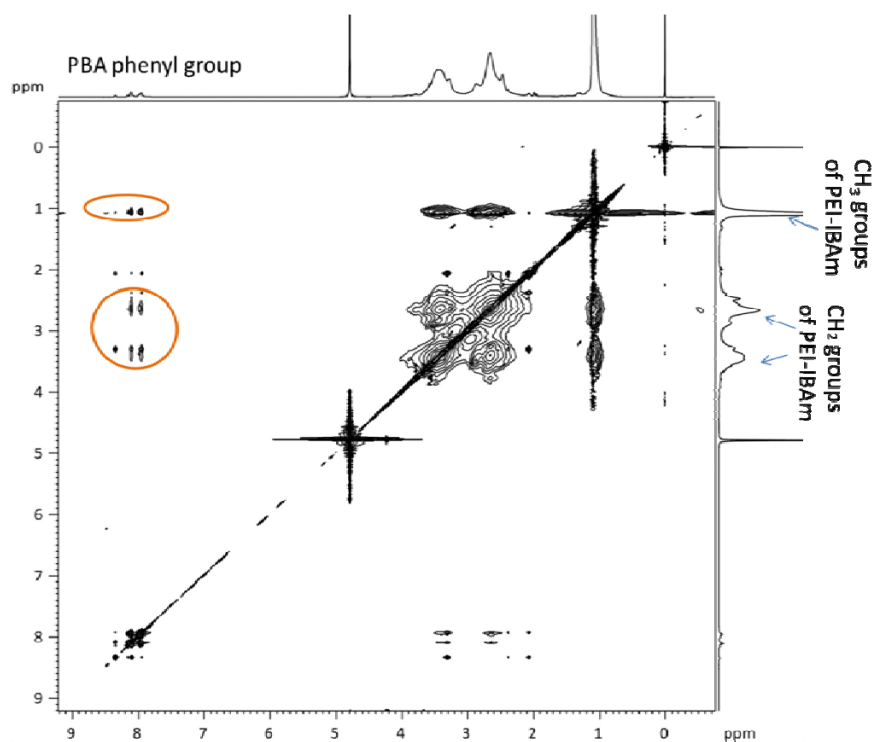

**Figure S4.** The typical 2D NOESY  $^1\text{H}$  NMR spectrum of supramolecular complex of PEI-IBAm with PBA in  $\text{D}_2\text{O}$

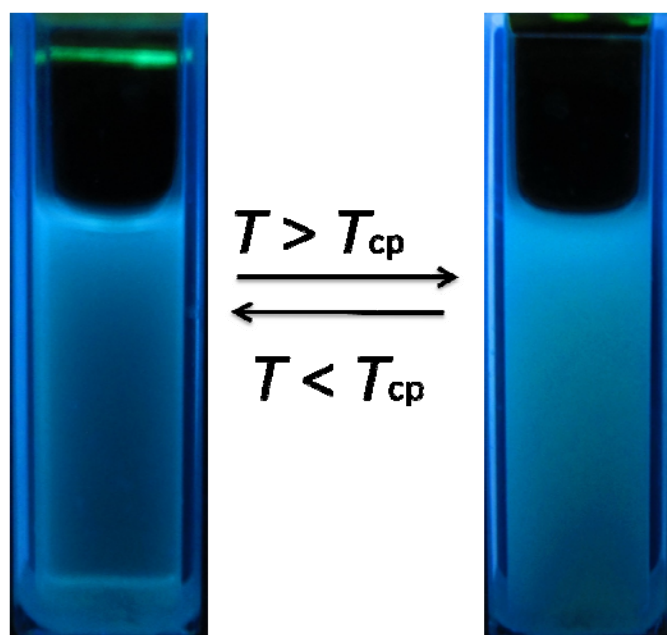

**Figure S5.** The typical luminescent photographs of T-GQD below and above the phase transition temperature (T-GQD3 as the representative)

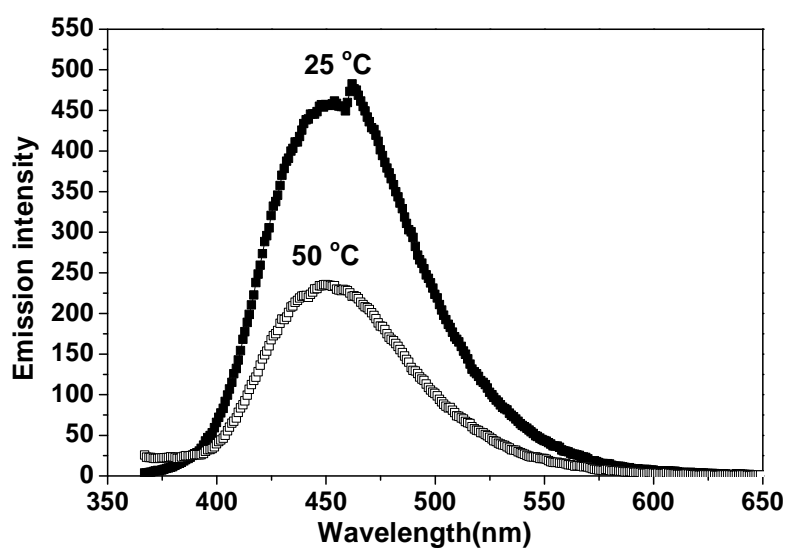

**Figure S6.** The typical emission spectra of GQD3 at room temperature (25 °C) and 50 °C (concentration of GQD3 is 6 mg/mL)

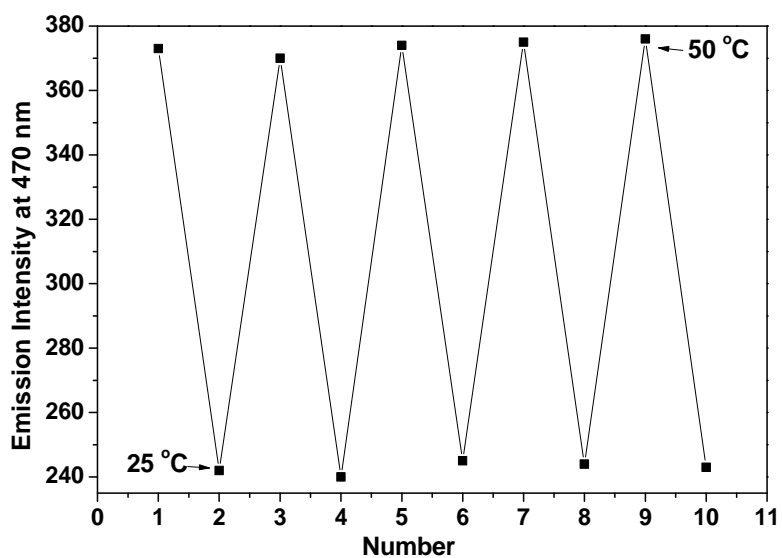

**Figure S7.** The effect of heating–cooling cycle on the reversibility of the emission intensity of T-GQD3 at room temperature (25 °C) and 50 °C (concentration of T-GQD3 is 12 mg/mL; excitation wavelength is 350 nm)
